# Supplementary material for: Characteristics and fate of isolated permafrost patches in coastal Labrador, Canada
Source: Copernicus journal article supplement (doi:10.5194/tc-2017-271), 2018-01-04
Supplement: Supplementary file 1 [file tc-2017-271-supplement.pdf]

## Supplemental information for Characteristics and fate of isolated permafrost patches in coastal Labrador, Canada

Robert G. Way<sup>1,2</sup>, Antoni G. Lewkowicz<sup>1</sup>, Yu Zhang<sup>3</sup>

<sup>1</sup>Department of Geography, Environment and Geomatics, University of Ottawa, Ottawa, K1N6N5, Canada

<sup>2</sup>Labrador Institute, Memorial University of Newfoundland, Happy Valley-Goose Bay, A0P1E0, Canada

<sup>3</sup>Canada Centre for Mapping and Earth Observation, Natural Resources Canada, Ottawa, K1A0E4, Canada

Correspondence to: Robert G. Way (rway024@uottawa.ca)

**Table S1.** Parameters for ground temperature modelling with NEST at Cartwright and Blanc Sablon.

| Parameter                                                            | Cartwright<br>(WJD02)                             | Blanc Sablon<br>(WJD03)                           |
|----------------------------------------------------------------------|---------------------------------------------------|---------------------------------------------------|
| Latitude                                                             | 53.7°N                                            | 51.45°N                                           |
| Peat thickness                                                       | 1.20 m                                            | 1.75 m                                            |
| Degree of decomposition                                              | Increased from 0.1 to 0.4                         | Increased from 0.1 to 0.4                         |
| Organic matter content                                               | 100% at the bottom of peat to 1% near the bedrock | 100% at the bottom of peat to 1% near the bedrock |
| Degree of decomposition                                              | Increased from 1.0 to 2.5 with depth              | Increased from 1.0 to 2.5 with depth              |
| Sub-peat stratigraphy                                                | Silt 1.2-3.2 m<br>Sand 3.2-10 m                   | Silt 1.75-3.2 m<br>Sand 3.2-10 m                  |
| Depth to bedrock                                                     | 10 m                                              | 10 m                                              |
| Fraction of quartz in mineral soil                                   | 0.1                                               | 0.1                                               |
| Thermal conductivity of rock                                         | 0.015 W/cm·K                                      | 0.015 W/cm·K                                      |
| Geothermal heat flux                                                 | 1.02 W/m <sup>2</sup>                             | 0.54 W/m <sup>2</sup>                             |
| Lateral surface water outflow                                        | Water table reduces 10% when above ground surface | Water table reduces 10% when above ground surface |
| Lateral surface water inflow                                         | 0                                                 | 0                                                 |
| Lateral ground water inflow/outflow                                  | 0                                                 | 0                                                 |
| Vegetation type                                                      | Shrub                                             | Shrub                                             |
| Leaf area index (peak growing season)                                | 0.5                                               | 0.2                                               |
| Snow wind-scouring factor (fraction of snowfall blown from the site) | 0.83                                              | 0.85                                              |
| Surface albedo                                                       | 0.1                                               | 0.1                                               |

**Table S2.** Characteristics of peatland permafrost mounds surveyed using ERT.

| <b>ERT Profile</b> | <b>Mound ID</b> | <b>Frost table depth (cm)</b> | <b>Maximum mound height (m)</b> | <b>Inferred permafrost depth (m)</b> | <b>Calculated permafrost thickness (m)</b> | <b>Excess ice fraction<sup>a</sup></b> |
|--------------------|-----------------|-------------------------------|---------------------------------|--------------------------------------|--------------------------------------------|----------------------------------------|
| 1                  | P1              | 60                            | 0.9                             | 3.4                                  | 2.8                                        | 0.33                                   |
| 1                  | P2              | 57                            | 1.2                             | 4.5                                  | 3.9                                        | 0.31                                   |
| 1 & 2              | P3              | 60                            | 1.4                             | 6.5                                  | 5.9                                        | 0.23                                   |
| 1                  | P4              | 62                            | 0.4                             | 4.3                                  | 3.7                                        | 0.12                                   |
| 3                  | P5              | 58                            | 0.4                             | 2.5                                  | 1.9                                        | 0.22                                   |
| 3                  | P7              | 54                            | 1.1                             | 4.5                                  | 4.0                                        | 0.28                                   |
| 3                  | P8              | 41                            | 0.5                             | 1.2                                  | 0.8                                        | 0.58                                   |
| 4                  | P9              | 61                            | 0.5                             | 3.4                                  | 2.8                                        | 0.16                                   |
| 4                  | P10             | 65                            | 0.8                             | 2.3                                  | 1.7                                        | 0.50                                   |
| 4                  | P11             | 63                            | 0.7                             | 5.2                                  | 4.6                                        | 0.15                                   |
| 5                  | P12             | 47                            | 0.6                             | 2.3                                  | 1.9                                        | 0.34                                   |
| 5                  | P13             | 49                            | 0.4                             | 2.7                                  | 2.2                                        | 0.17                                   |
| 5                  | P14             | 45                            | 1.3                             | 5.8                                  | 5.4                                        | 0.29                                   |
| 5                  | P15             | 39                            | 0.3                             | 3.0                                  | 2.7                                        | 0.11                                   |
| 5                  | P16             | 46                            | 0.3                             | 2.9                                  | 2.5                                        | 0.10                                   |
| 5                  | P17             | 51                            | 0.5                             | 5.1                                  | 4.6                                        | 0.11                                   |
| 6                  | P18             | 44                            | 0.8                             | 4.3                                  | 3.9                                        | 0.21                                   |
| 7                  | P19             | 37                            | 0.6                             | 3.5                                  | 3.1                                        | 0.19                                   |
| 7                  | P20             | 40                            | 0.8                             | 5.0                                  | 4.6                                        | 0.18                                   |
| 7                  | P21             | 40                            | 1.0                             | 5.6                                  | 5.2                                        | 0.18                                   |
| 7                  | P22             | 37                            | 0.7                             | 5.4                                  | 5.0                                        | 0.13                                   |
| 8                  | P23             | 40                            | 0.7                             | 5.2                                  | 4.8                                        | 0.13                                   |
| 9                  | P24             | 42                            | 0.3                             | 2.8                                  | 2.4                                        | 0.13                                   |
| 9                  | P25             | 46                            | 0.6                             | 4.1                                  | 3.7                                        | 0.17                                   |
| 10                 | P26             | 41                            | 0.5                             | 4.1                                  | 3.7                                        | 0.13                                   |
| 11                 | P27             | 40                            | 0.3                             | 3.3                                  | 2.9                                        | 0.10                                   |

<sup>a</sup> Calculated using **EQ 1**.

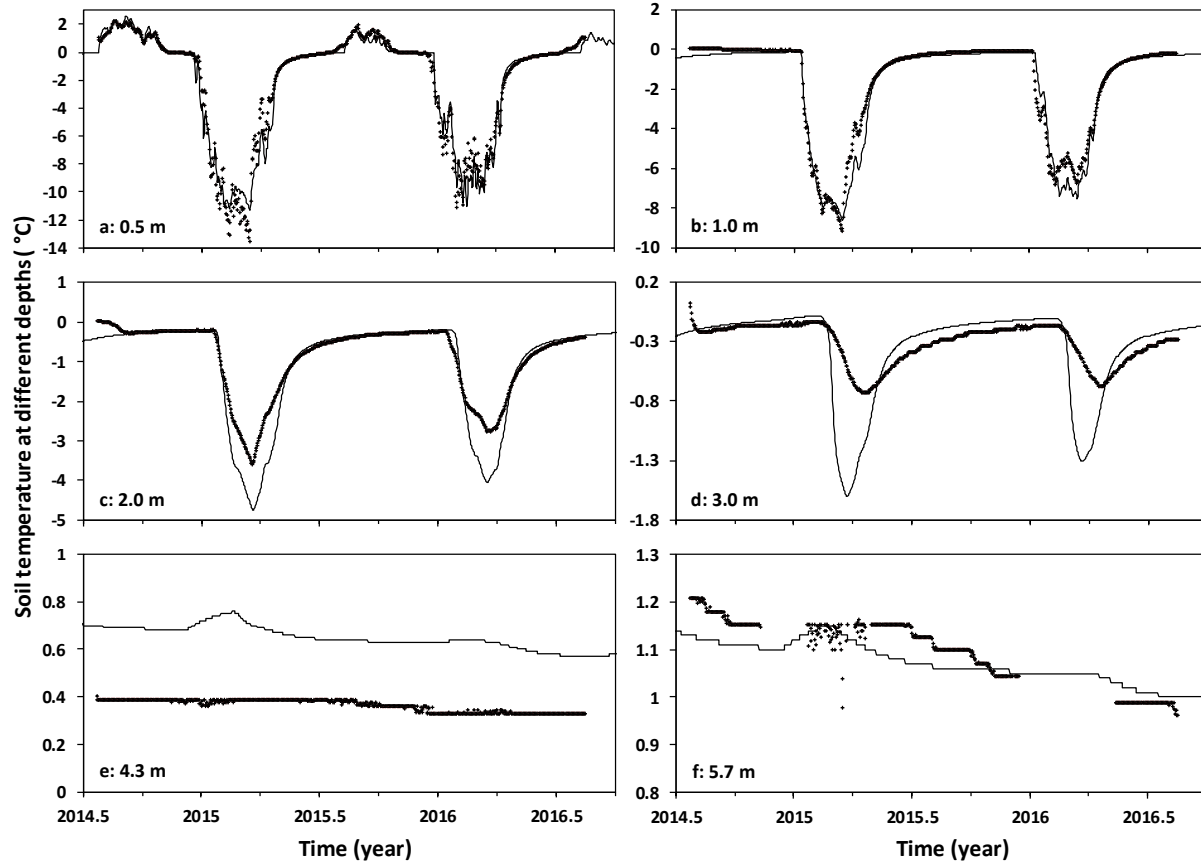

**Figure S1.** Comparison of modelled and measured temperatures at different depths at the Cartwright (WJD02) borehole, 2014-2016. The thin lines are modelled and the crosses are measured values. The depths are shown in the panels. At 0.5 m,  $n=755$ ;  $r^2=0.94$ ; mean difference:  $-0.1^\circ\text{C}$ ; mean absolute difference:  $0.75^\circ\text{C}$ . Note: temperature scales differ among the panels.

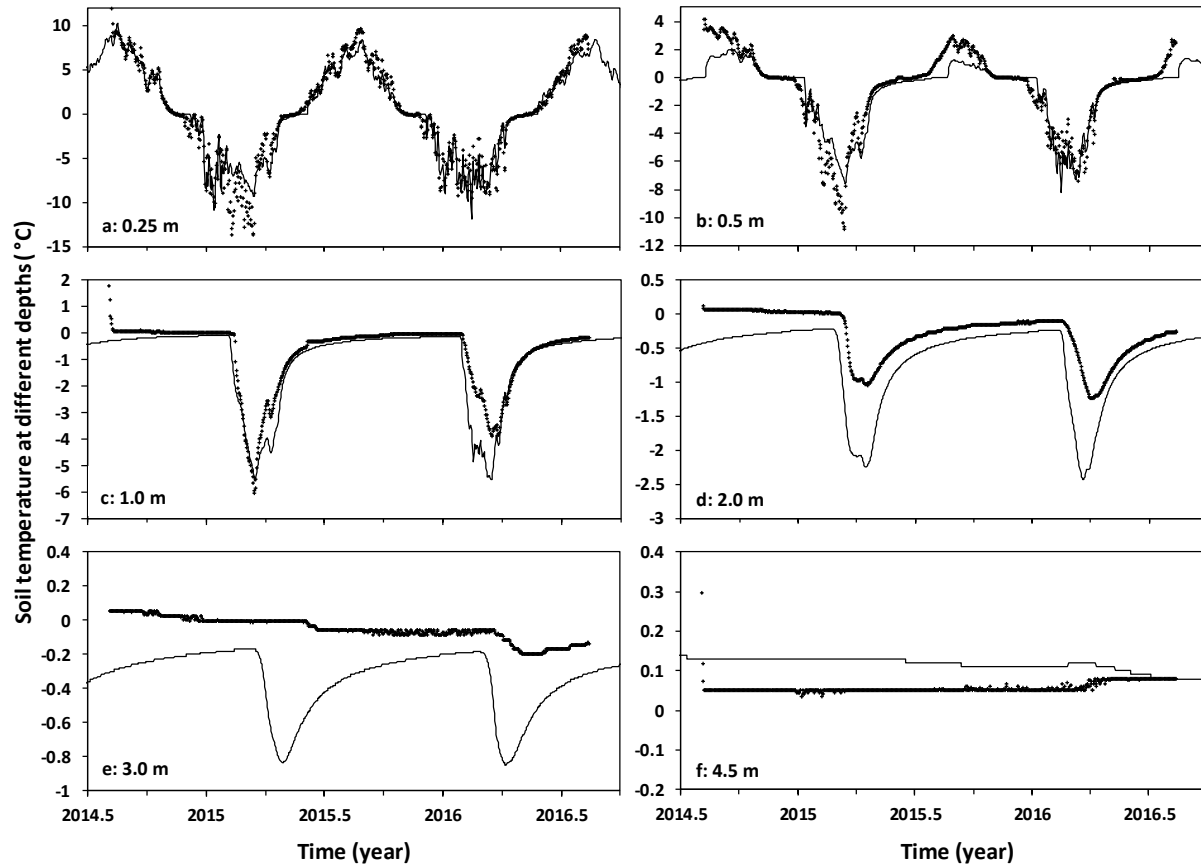

**Figure S2.** Comparison of modelled and measured temperatures at different depths at the Blanc Sablon (WJD03) borehole, 2014-2016. The thin lines are modelled and the crosses are measured values. The depths are shown in the panels. At 0.25 m,  $n=621$ ;  $r^2=0.94$ ; mean difference:  $-0.14^\circ\text{C}$ ; mean absolute difference:  $0.93^\circ\text{C}$ . Note: temperature scales differ among the panels.

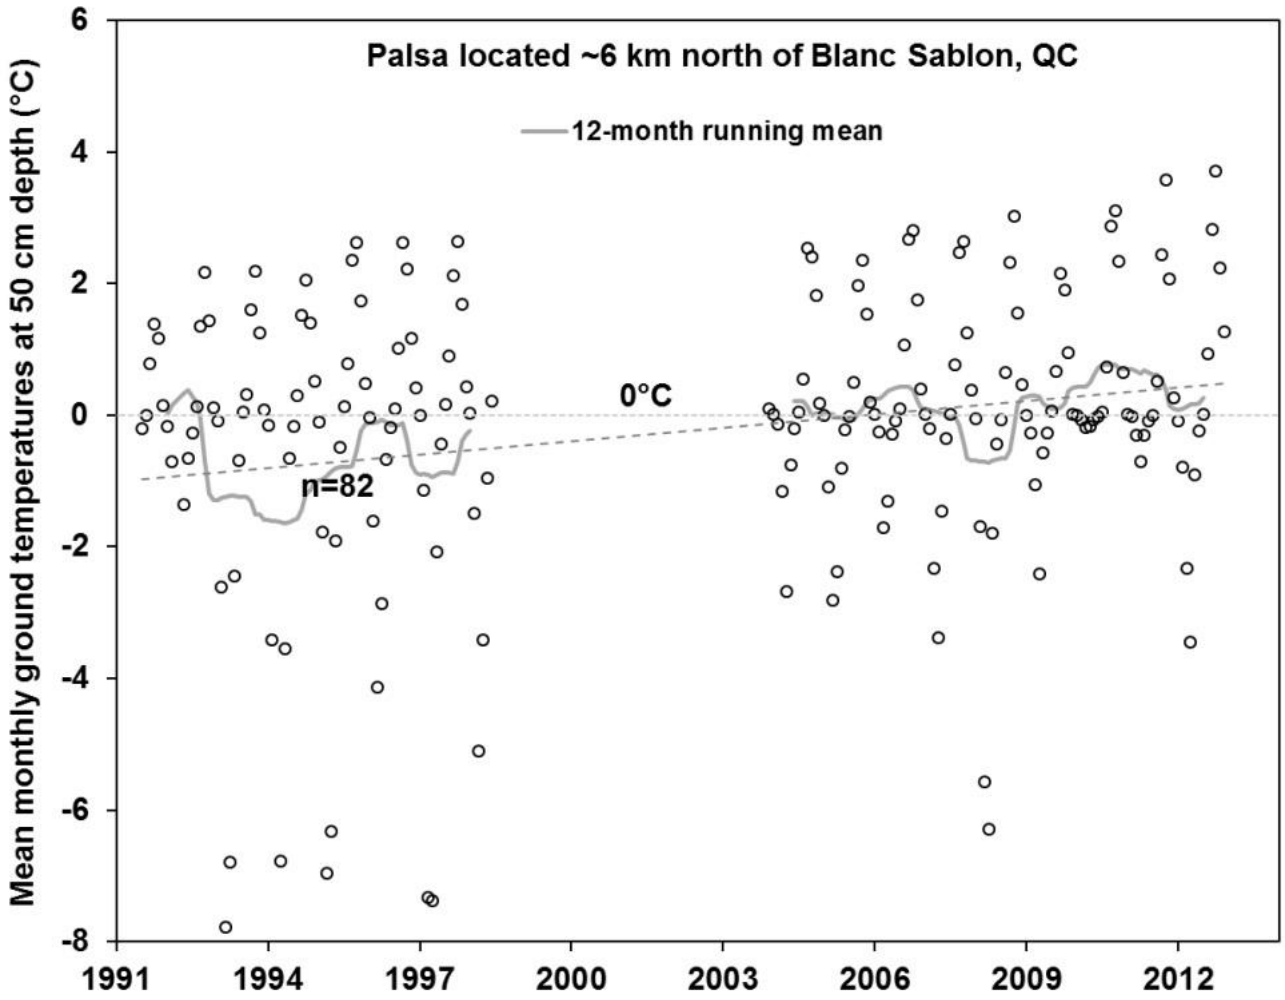

**Figure S3.** Monthly ground temperatures at 50 cm depth (1991-2012) in a palsa field near Blanc Sablon (from Allard et al. 2014).

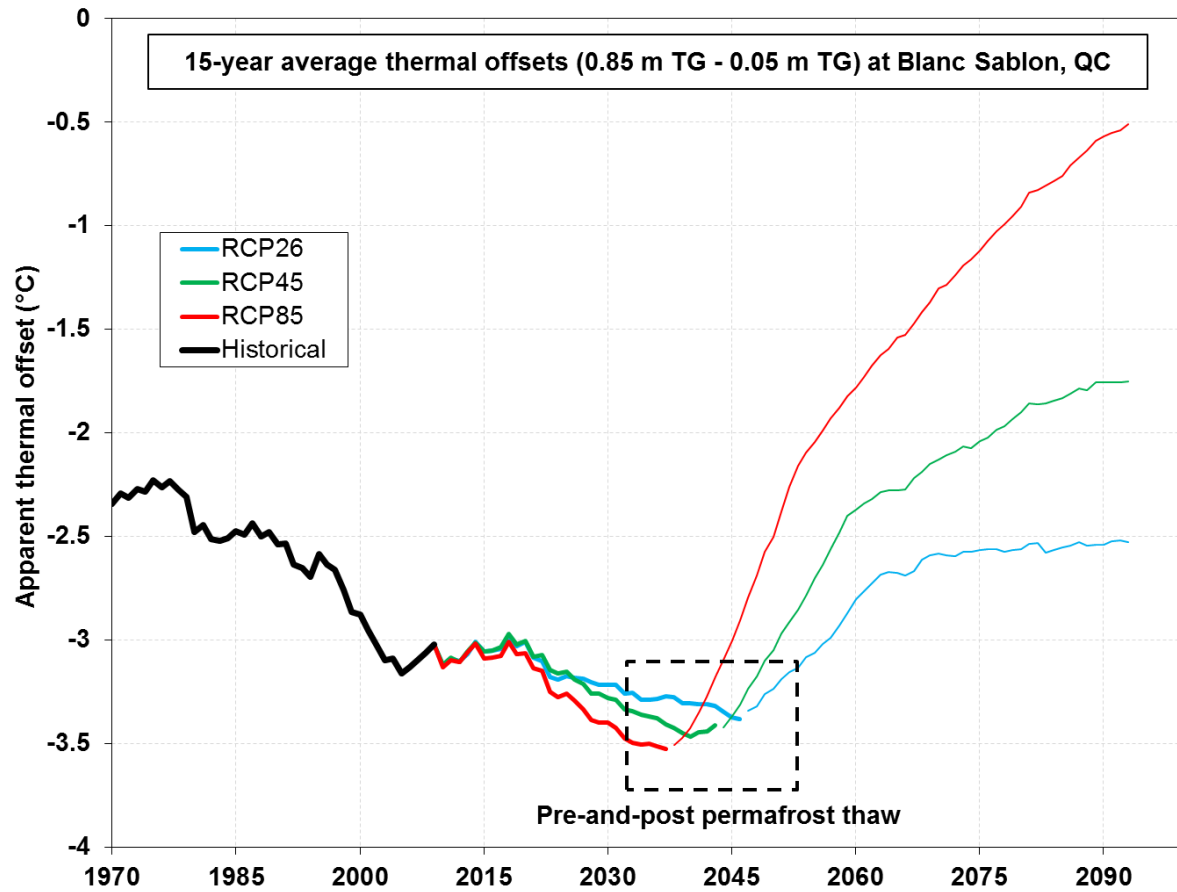

**Figure S4.** Centred 15-year average apparent thermal offsets for historical and future climate scenarios at Blanc Sablon, QC. Thicker lines denote the presence of permafrost and thinner lines denote the absence of permafrost.
